# Supplementary material
Source: PubMed Central journal article supplement (PMC2858219)
Supplement: NIHMS193365-supplement-01.pdf [file NIHMS193365-supplement-01.pdf]

**Supplementary Table 3**

| ErbB4      | EGFR | ErbB2 | Contact | Lapatinib atom |
|------------|------|-------|---------|----------------|
| D836 (N)   | D    | D     | H-bond  | F34            |
| F837 (N,O) | F    | F     | H-bond  | F34            |
| 774M (N,O) | M    | M     | H-bond  | N18            |
| F837       | F    | F     | VDW     | F34, C32       |
| M747       | M    | M     | VDW     | C33            |
| L839       | L    | L     | VDW     | C35            |
| L769       | L    | L     | VDW     | C28            |
| T771       | T    | T     | VDW     | O27            |
| T835       | T    | T     | VDW     | C25            |
| V707       | V    | V     | VDW     | C23            |
| L825       | L    | L     | VDW     | C21, C39       |
| 724A       | A    | A     | VDW     | C19, C38       |
